# Supplementary figures and images for: Complete Clinical Remission of Stage IV Triple-Negative Breast Cancer Lung Metastasis Administering Low-Dose Immune Checkpoint Blockade in Combination With Hyperthermia and Interleukin-2
Source: PubMed Central journal article supplement — Integr Cancer Ther. 2018 Sep 7;17(4):1297–303. doi: 10.1177/1534735418794867 (PMC6247552; doi:10.1177/1534735418794867), 2018-09-07

**A**

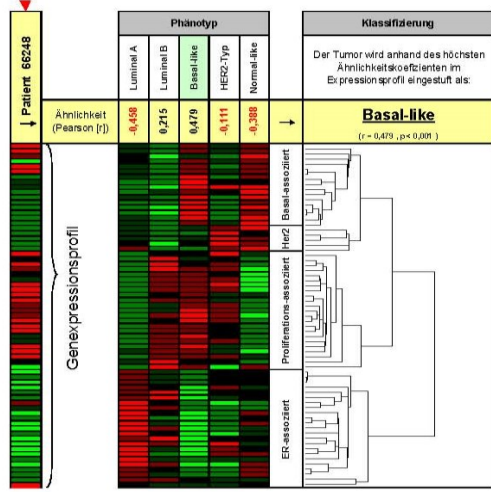

**B**

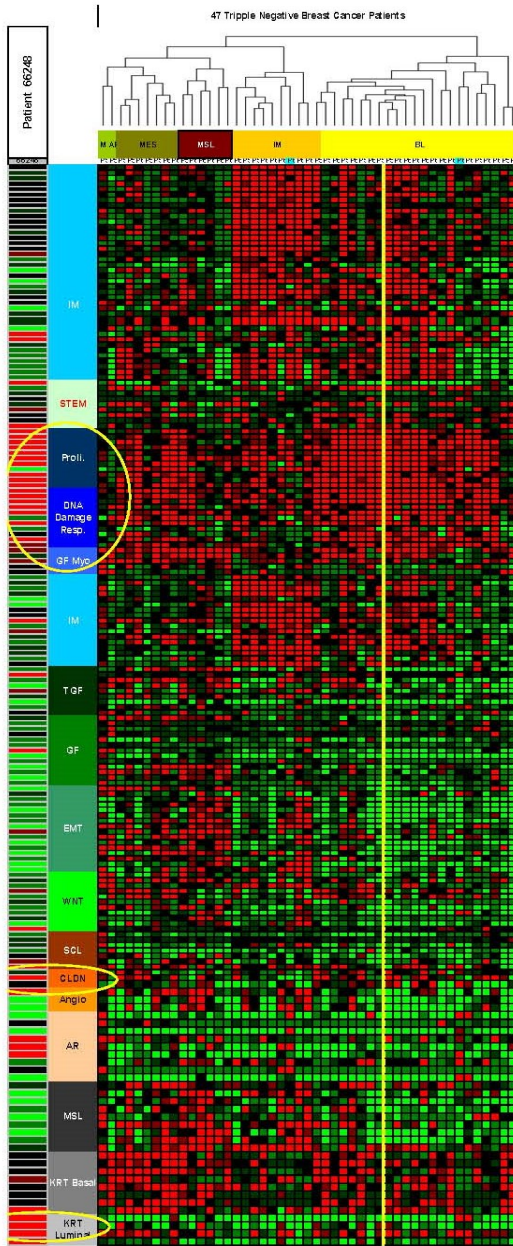

Supplement: Figure_S1_TNBC_JICT.pdf [file Figure_S1_TNBC_JICT.pdf]
